# Supplementary material for: Anderson polyoxometalate built-in covalent organic frameworks for enhancing catalytic performances
Source: Royal Society of Chemistry journal article supplement (doi:10.1039/d0ta02443k), 2020-01-01
Supplement: d0ta02443k1.pdf [file d0ta02443k1.pdf]

## Anderson polyoxometalate built-in covalent organic frameworks for enhancing catalytic performances

Rui Ma,<sup>a</sup> Naifang Liu,<sup>b</sup> Ting-Ting Lin,<sup>b</sup> Tianbo Zhao,<sup>a</sup> Sheng-Li Huang,<sup>\*,a</sup> Guo-Yu Yang<sup>\*,a</sup>

<sup>a</sup> MOE Key Laboratory of Cluster Science, School of Chemistry and Chemical Engineering, Beijing Institute of Technology, Beijing, 100081, China

<sup>b</sup> Institute of Materials Research and Engineering, A\*STAR, 2 Fusionopolis Way, Innovis, Singapore, 138634, Singapore

### Experimental Section

#### Materials and physical measurements:

All materials and solvents were obtained from Energy Chemical Co. Ltd., TCI (Shanghai) Development Co., Ltd., MACKLIN, Aladdin, Tianjin Guangfu Fine Chemical Research Institute, and used without further purification.

Fourier-transform Infrared (FT-IR) spectra were recorded at the range of 400-4000 cm<sup>-1</sup> on a Bruker ALPHA spectrometer. Thermogravimetric analyzer (TGA) was performed on a DTG-60 instrument (SHIMADZU, Beijing, China) at a heating rate of 5 °C min<sup>-1</sup> from room temperature to 800 °C under nitrogen atmosphere with a flow rate of 100 mL min<sup>-1</sup>. Powder X-ray diffraction (PXRD) patterns of the samples were measured with a Cu-K $\alpha$  X-ray radiation source ( $\lambda = 0.154056$  nm) incident radiation by a Rigaku MiniFLEX 600 instrument operating at 40 kV voltage and 50 mA current. UV-vis absorption spectra were recorded on a Shimadzu Corporation UV-2600 220V CH spectrometer. The Xe lamp (300 W) with 410 nm optical filters were readjusted to the power density of 100 mW cm<sup>-2</sup> prior to the experimental process.

#### Synthesis:

$\text{NH}_2\text{-}\{\text{MnMo}_6\}\text{-NH}_2$  ( $[\text{N}(\text{C}_4\text{H}_9)_4]_3[\text{MnMo}_6\text{O}_{18}\{(\text{OCH}_2)_3\text{CNH}_2\}_2]$ ),  $\text{NH}_2\text{-}\{\text{CoMo}_6\}\text{-NH}_2$  ( $[\text{N}(\text{C}_4\text{H}_9)_4]_3[\text{CoMo}_6\text{O}_{18}\{(\text{OCH}_2)_3\text{CNH}_2\}_2]$ ),  $\text{NH}_2\text{-}\{\text{FeMo}_6\}\text{-NH}_2$  ( $[\text{N}(\text{C}_4\text{H}_9)_4]_3[\text{FeMo}_6\text{O}_{18}\{(\text{OCH}_2)_3\text{CNH}_2\}_2]$ ), and tetrakis(4-formylphenyl)silane (TFPS) were synthesized according to literatures.<sup>1-2</sup>

**Mn-Anderson-COF:** 1000 mg of  $\text{NH}_2\text{-}\{\text{MnMo}_6\}\text{-NH}_2$  and 119 mg of TFPS were dissolved in 15 mL of acetonitrile, and then added into a Teflon-lined autoclave. The Teflon-lined autoclave was placed in an oven at 80 °C for 3 days. The solid was thoroughly washed by acetonitrile and collected via centrifugation. The obtained solid was dried under vacuum to yield Mn-Anderson-COF (901 mg, 82% based on TFPS). Elemental Analysis: for  $\text{SiC}_{140}\text{H}_{260}\text{Mn}_2\text{Mo}_{12}\text{N}_{10}\text{O}_{48}$ : Calcd. Si 0.68%, C 40.60%, H 6.28%, N 3.38%, Mn 2.66%, Mo 27.84%, Found Si 0.67%, C 40.52%, H 6.19%, N 3.26%, Mn 2.54%, Mo 27.61%. IR (KBr,  $\text{cm}^{-1}$ ): 2960 ( $\nu_{\text{as}}$  NH s), 2933 ( $\nu$  CH s), 2873 ( $\nu$  CH s), 1643 ( $\nu$  C=N m), 1481 ( $\delta$  CH, s), 1382 ( $\delta$  CH, m), 1263 (s), 1157 (m), 1093 ( $\nu$  CO m), 1030 ( $\nu$  CO s), 941 ( $\nu$  Mo=O s), 920 ( $\nu$  Mo=O s), 903 ( $\nu$  Mo=O s), 819 (w), 736 (w), 667 ( $\nu$  Mo-O-Mo s), 563 (m), 522 (w), 486 (w), 411(w)  $\text{cm}^{-1}$ .

**Co-Anderson-COF:** A similar method as described above. The obtained solid was Co-Anderson-COF (878 mg, 80% based on TFPS). Elemental Analysis: for  $\text{SiC}_{140}\text{H}_{260}\text{Co}_2\text{Mo}_{12}\text{N}_{10}\text{O}_{48}$ : Calcd. Si 0.68%, C 40.52%, H 6.27%, N 3.38%, Co 2.85%, Mo 27.79%, Found Si 0.67%, C 40.46%, H 6.17%, N 3.25%, Co 2.77%, Mo 27.64%. IR (KBr,  $\text{cm}^{-1}$ ): 2962 ( $\nu_{\text{as}}$  NH s), 2937 ( $\nu$  CH s), 2875 ( $\nu$  CH s), 1643 ( $\nu$  C=N m), 1481 ( $\delta$  CH, s), 1383 ( $\delta$  CH, m), 1263 (s), 1157 (m), 1103 ( $\nu$  CO m), 1031 ( $\nu$  CO s), 939 ( $\nu$  Mo=O s), 921 ( $\nu$  Mo=O s), 904 ( $\nu$  Mo=O s), 819 (w), 741 (w), 667 ( $\nu$  Mo-O-Mo s), 570 (m), 523 (w), 487 (w), 434 (w)  $\text{cm}^{-1}$ .

**Fe-Anderson-COF:** A similar method as described above. The obtained solid was Fe-Anderson-COF (857 mg, 78% based on TFPS). Elemental Analysis: for  $\text{SiC}_{140}\text{H}_{260}\text{Fe}_2\text{Mo}_{12}\text{N}_{10}\text{O}_{48}$ : Calcd. Si 0.68%, C 40.58%, H 6.28%, N 3.38%, Fe 2.71%, Mo 27.83%, Found Si 0.67%, C 40.46%, H 6.17%, N 3.29%, Fe 2.66%, Mo 27.73%. IR (KBr,  $\text{cm}^{-1}$ ): 2962 ( $\nu_{\text{as}}$  NH s), 2937 ( $\nu$  CH s), 2875 ( $\nu$  CH s), 1643 ( $\nu$  C=N m), 1483

( $\delta$  CH, s), 1383 ( $\delta$  CH, m), 1263 (s), 1155 (m), 1089 (v CO m), 1029 (v CO s), 941 (v Mo=O s), 922 (v Mo=O s), 903 (v Mo=O s), 821 (w), 725 (w), 667 (v Mo-O-Mo s), 563 (m), 526 (w), 479 (w), 451 (w)  $\text{cm}^{-1}$ .

Ion exchange on Mn-Anderson-COF ( $\text{Li}^+$ ):

300 mg of Mn-Anderson-COF was immersed in 2 mL of 100 mg diethyl ether solution of LiOTf at room temperature. The solution was change two times per day over two weeks. The process was monitored by digestion IR. Upon  $\text{Li}^+$  exchange, the characteristic peaks of  $\text{TBA}^+$  decreased as indicated at 2962  $\text{cm}^{-1}$ , 2937  $\text{cm}^{-1}$  and 2875  $\text{cm}^{-1}$ .

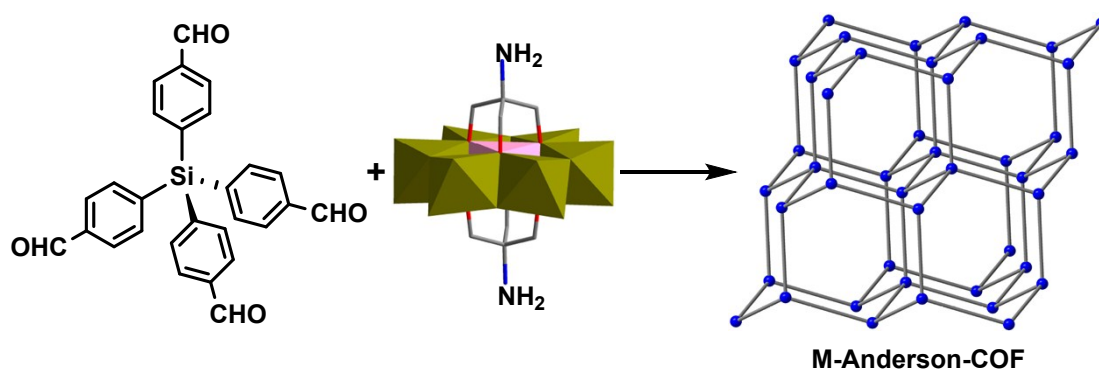

**Figure S1.** Designed synthesis of diamondoid network of **M-Anderson-COFs**.

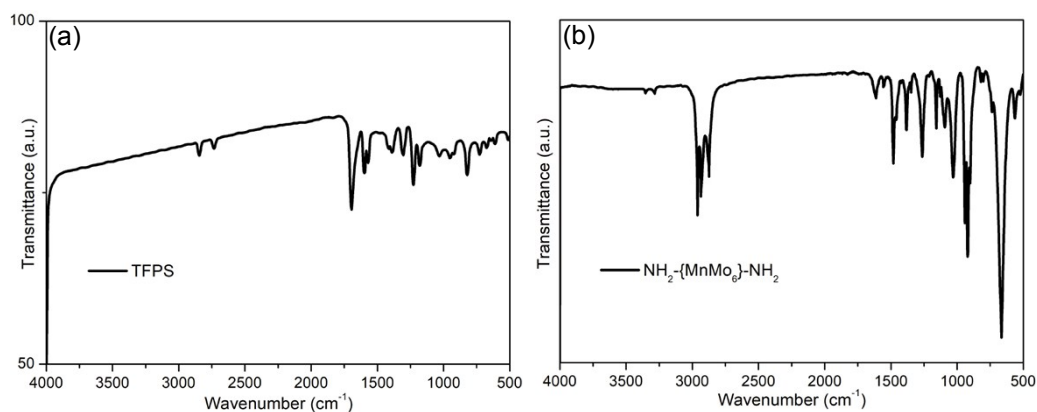

**Figure S2.** IR spectrums of TFPS and  $\text{NH}_2\text{-}\{\text{MnMo}_6\}\text{-NH}_2$ .

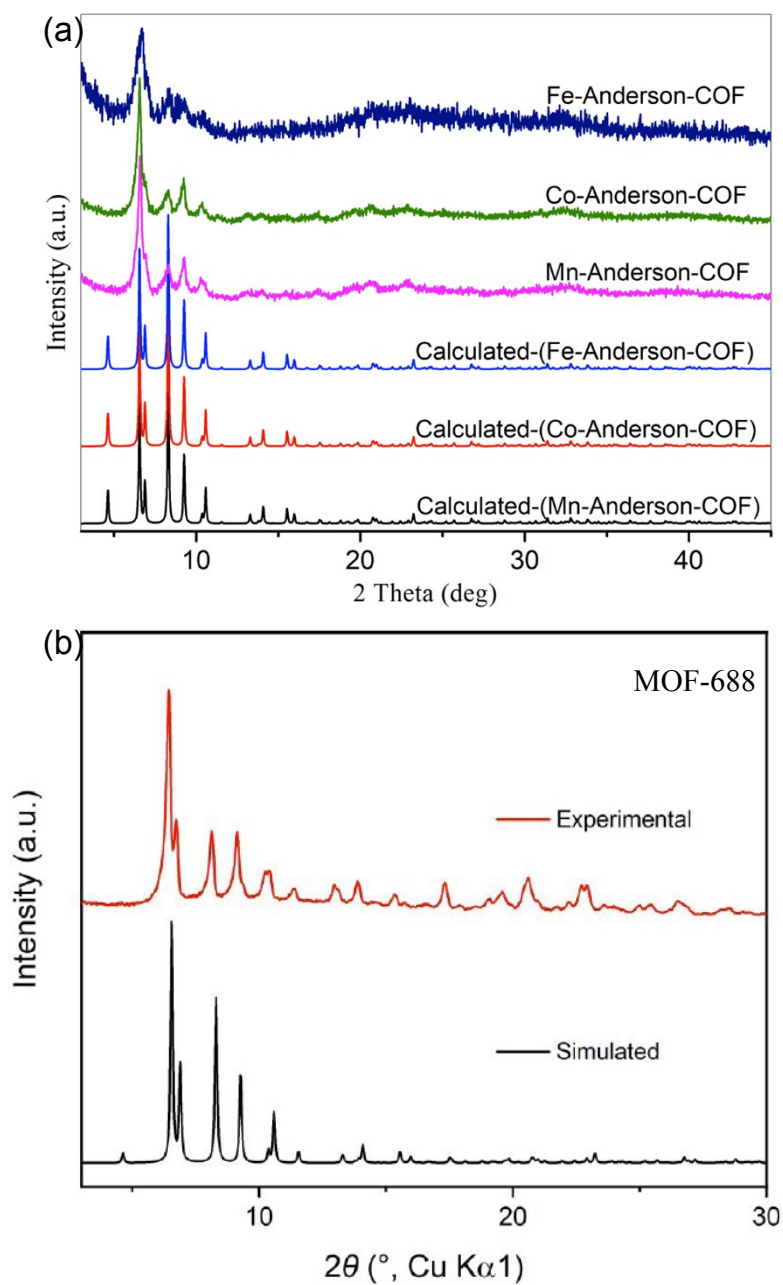

**Figure S3.** (a) Experimental and simulated PXRD patterns of **M-Anderson-COFs**; (b) Experimental and simulated PXRD patterns of MOF-688, adapted with permission from Ref. [24].

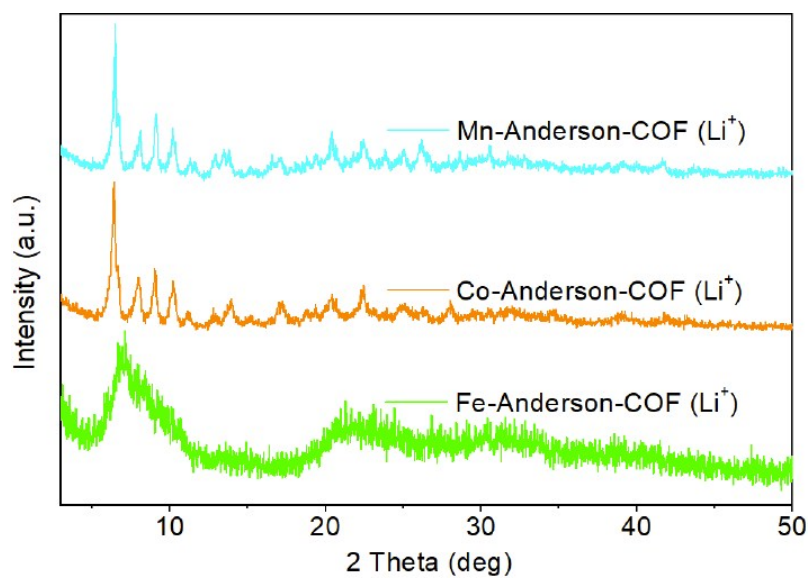

**Figure S4.** PXRD patterns of Li<sup>+</sup> exchanged M-Anderson-COFs.

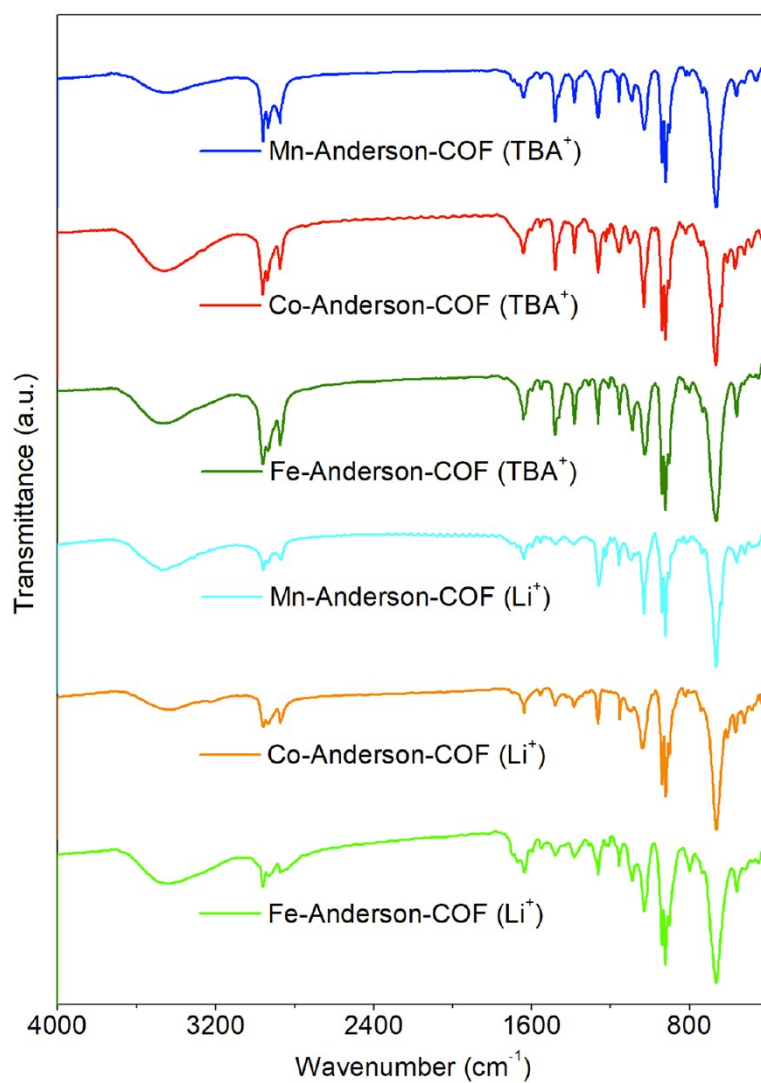

**Figure S5.** IR spectra of different samples.

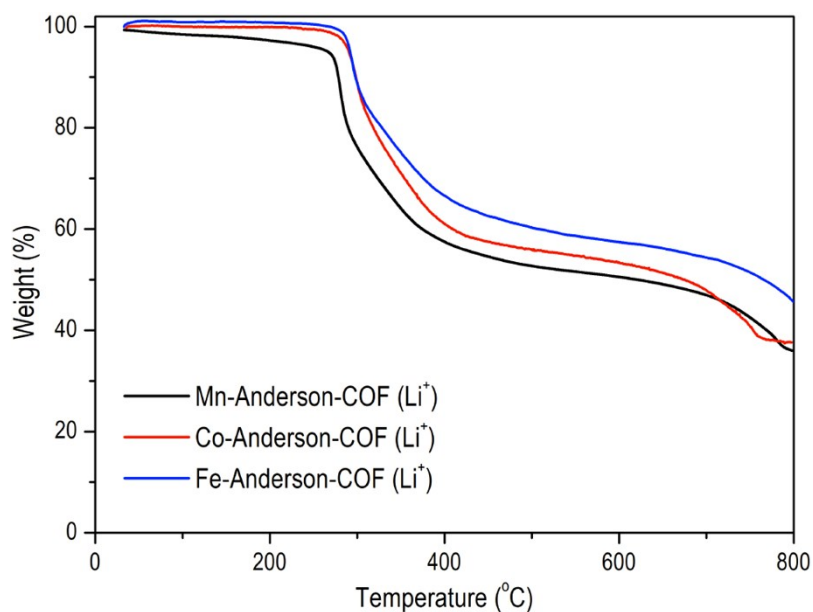

**Figure S6.** TGA of different samples.

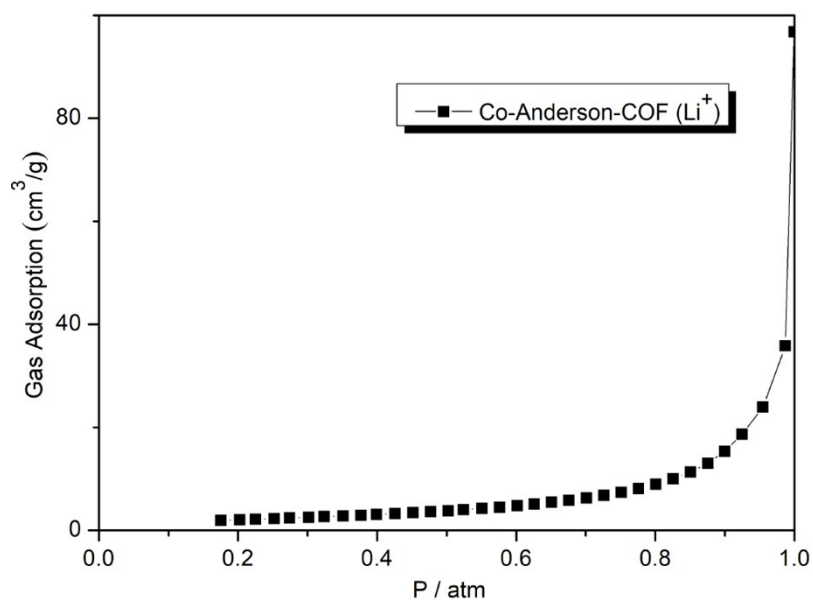

**Figure S7.** N<sub>2</sub> sorption curves (77 K) of Co-Anderson-COF (Li<sup>+</sup>).

#### **Experimental procedure of photodegradation of organic dyes:**

Catalysts (10 mg) were dispersed into the solution (100 mL) of organic dyes (100 mg/L), then magnetically stirred for 30 min in the dark. After this, the mixture was allowed to expose to visible light ( $\lambda > 410$  nm) from a 300 W Xenon lamp at a distance of 5 cm between the liquid surface and the lamp. The solution was kept stirring during irradiation. At an interval of 10 min, 4 mL of the mixture was taken out of the beaker for analysis after centrifugation.

The radical scavenger experiments were performed using Isopropanol (IP, a scavenger of  $\cdot\text{OH}$ , 99% 60  $\mu\text{L}/\text{mL}$ ), Superoxide dismutase (SOD, a scavenger of  $\cdot\text{O}_2^-$ , 0.4 g/L), Ammonium Oxalate (AO, a scavenger of  $\text{h}^+$ , 3 mmol/L), L-Histidine (L-His, a scavenger of  $^1\text{O}_2$ , 3 mmol/L) and Catalase (CAT, a scavenger of  $\text{H}_2\text{O}_2$ , 0.3 g/L), respectively. Other conditions remain unchanged.

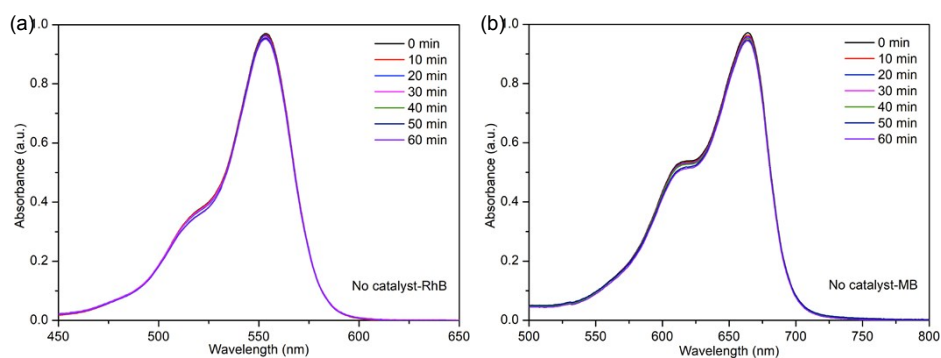

**Figure S8.** (a) UV-vis spectra of RhB (a) and MB (b) without catalyst.

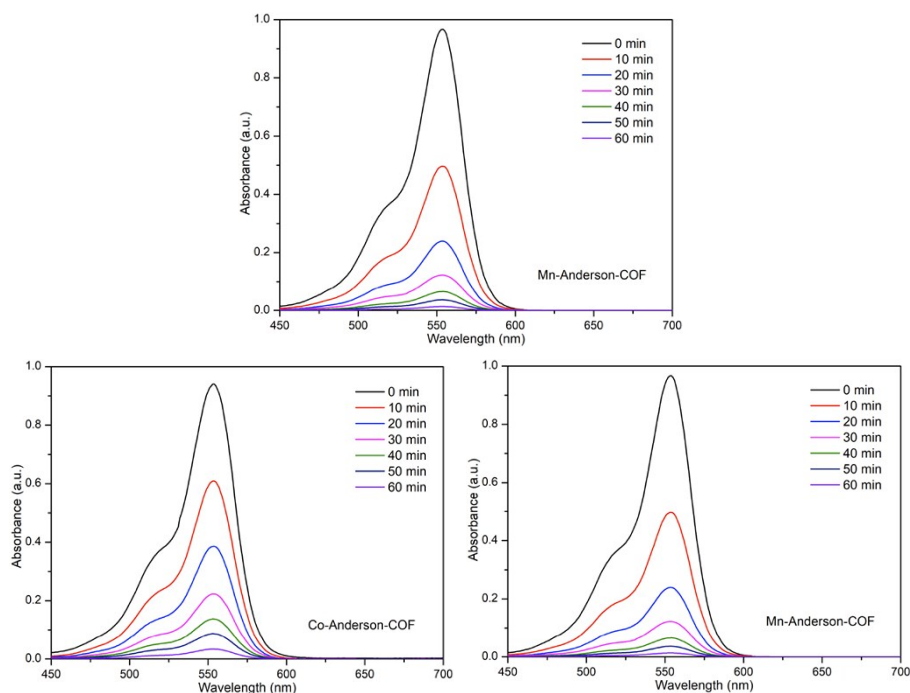

**Figure S9.** UV-vis spectra of RhB (100 mg/L) after different illumination time intervals in the presence of **M-Anderson-COF** (0.1 mg/mL) under 300 W xenon lamp with 450 nm optical filter.

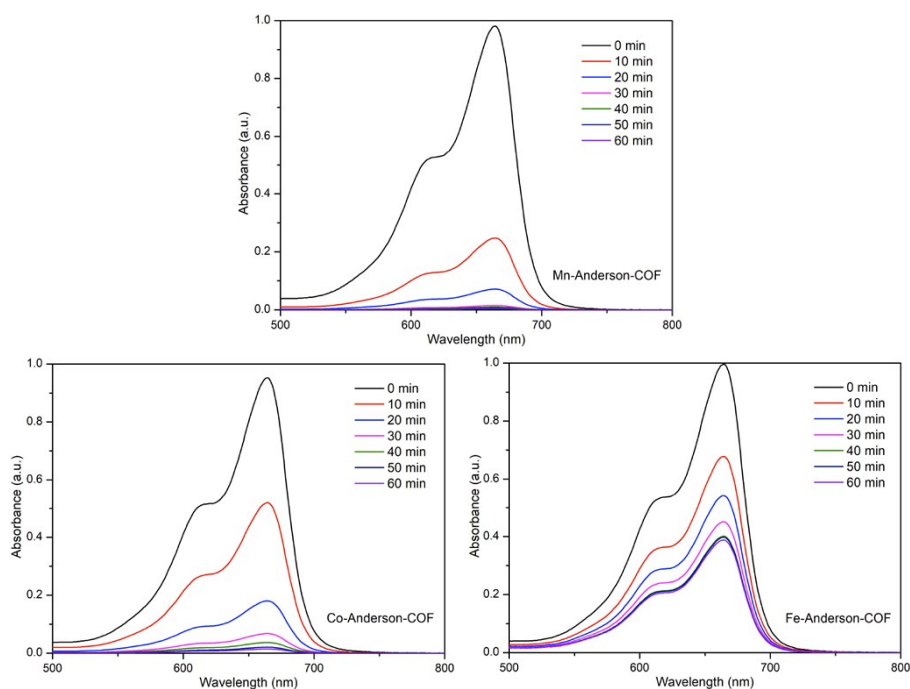

**Figure S10.** UV-vis spectra of MB (100 mg/L) after different illumination time intervals in the presence of **M-Anderson-COF** (0.1 mg/mL) under 300 W xenon lamp with 450 nm optical filter.

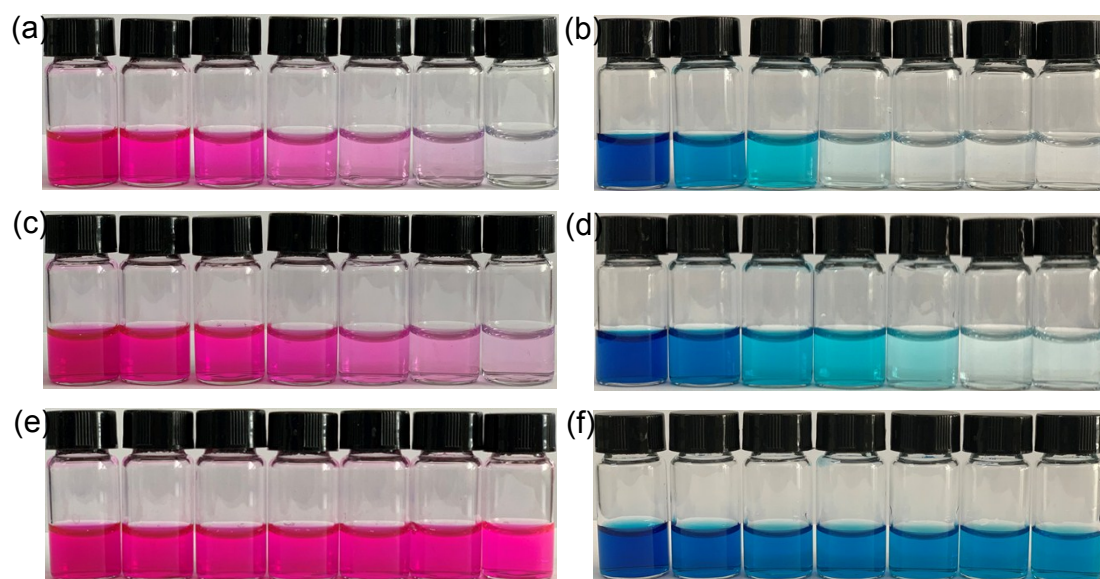

**Figure S11.** Photodegradation of RhB and MB using **M-Anderson-COF** catalysts in water. Concentration of **M-Anderson-COF**: 0.1 mg/mL, concentration of dye: 100 mg/L. The color change of dye when different **M-Anderson-COF** was used as catalyst [(a) dye = RhB, catalyst = **Mn-Anderson-COF**; (b) dye = MB, catalyst = **Mn-Anderson-COF**; (c) dye = RhB, catalyst = **Co-Anderson-COF**; (d) dye = MB, catalyst = **Co-Anderson-COF**; (e) dye = RhB, catalyst = **Fe-Anderson-COF**; (f) dye = MB, catalyst = **Fe-Anderson-COF**]. The sample interval is 10 min.



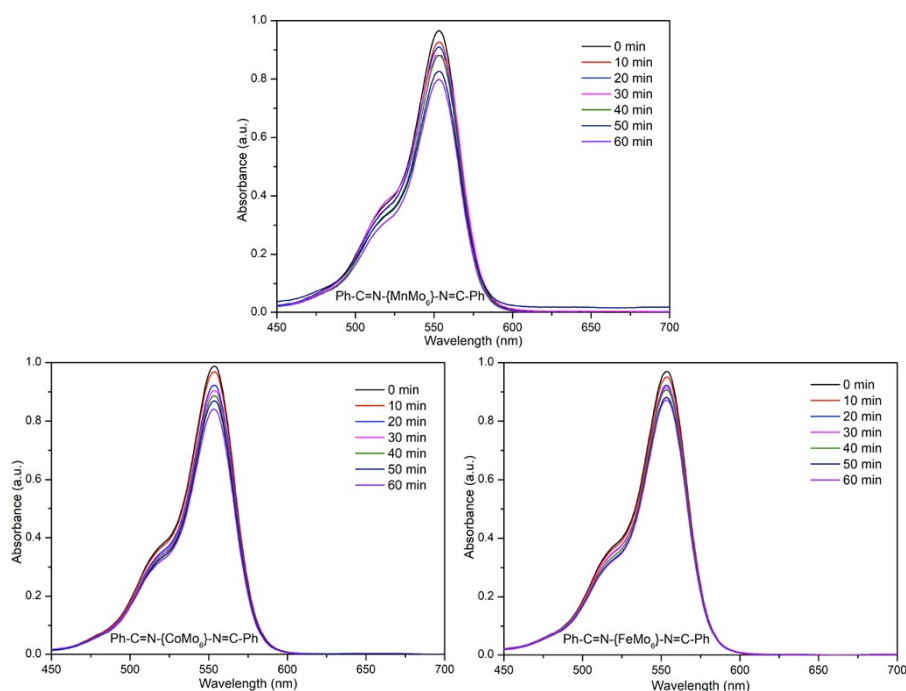

**Figure S12.** UV-vis spectra of RhB (100 mg/L) after different illumination time intervals in the presence of Ph-C=N-{MMo<sub>6</sub>}-N=C-Ph (0.1 mg/mL) under 300 W xenon lamp with 450 nm optical filter.

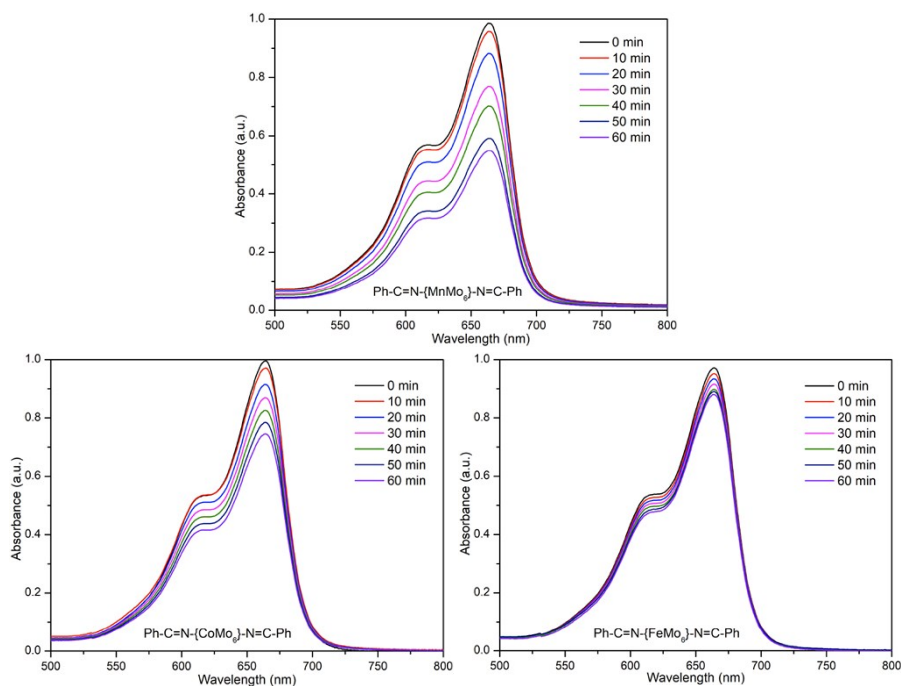

**Figure S13.** UV-vis spectra of MB (100 mg/L) after different illumination time intervals in the presence of Ph-C=N-{MMo<sub>6</sub>}-N=C-Ph (0.1 mg/mL) under 300 W xenon lamp with 450 nm optical filter.

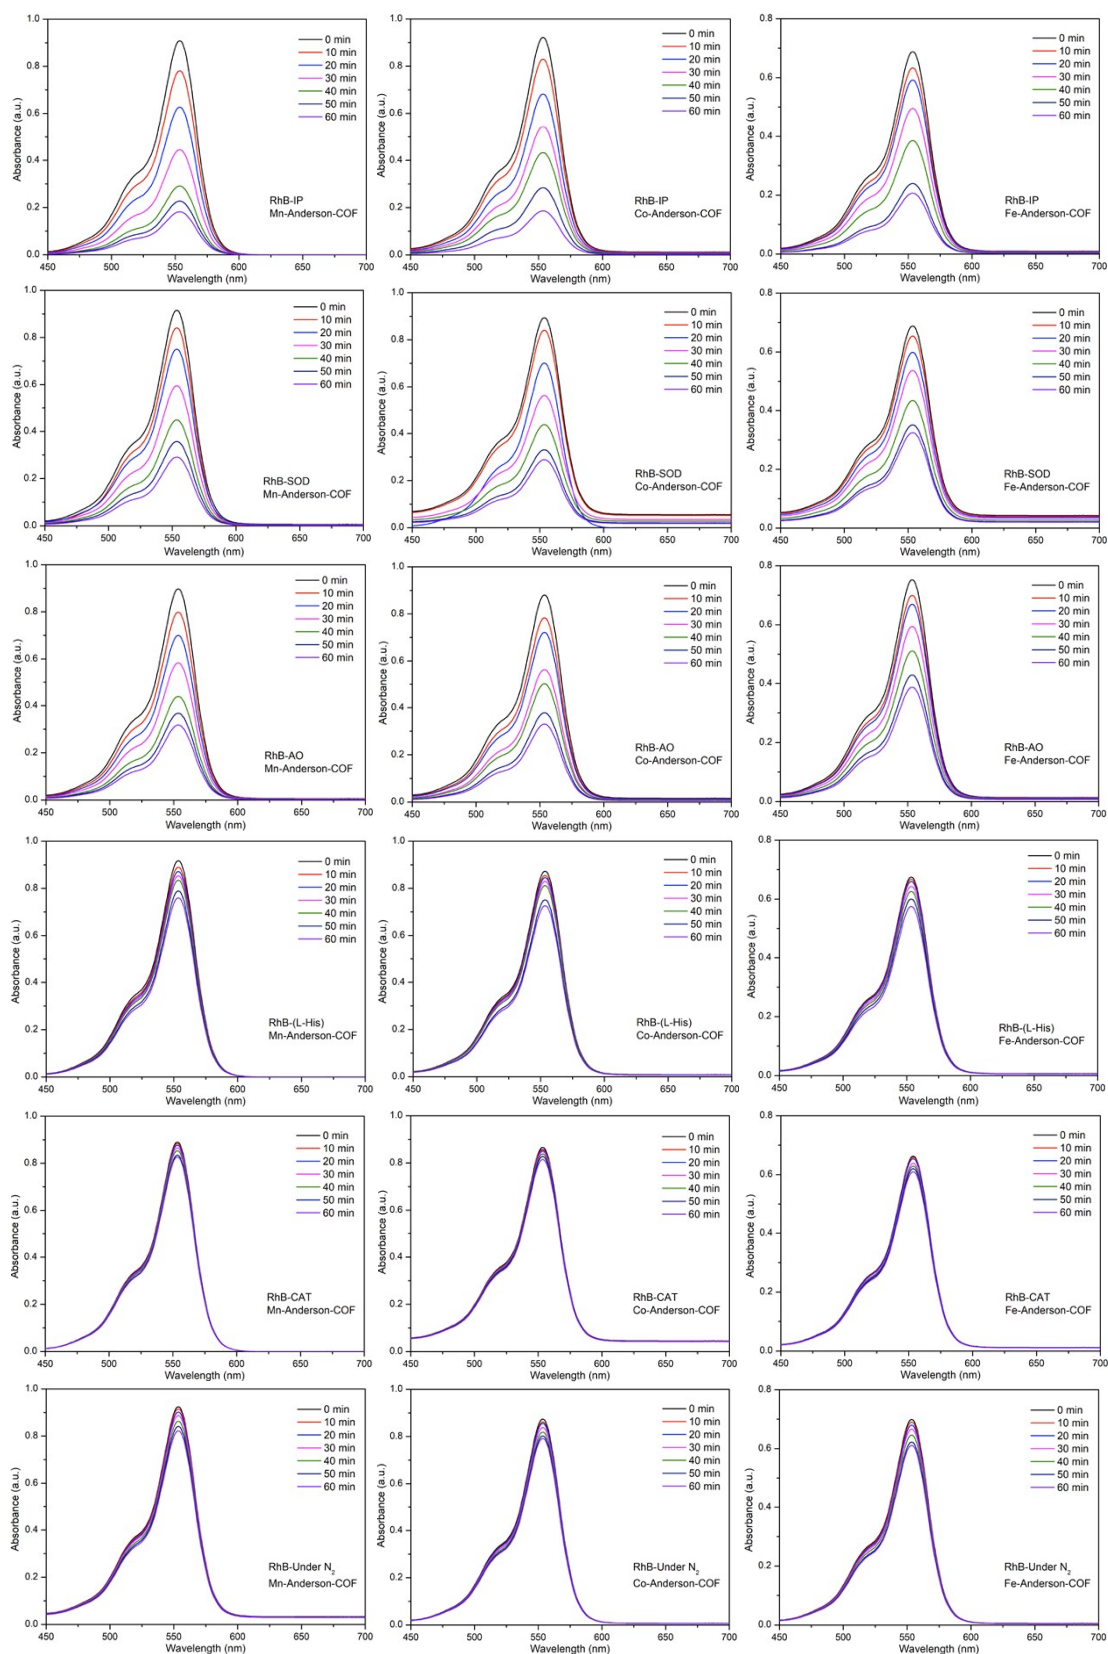

**Figure S14.** UV-vis spectra of RhB (100 mg/L) after different illumination time intervals in the presence of **M-Anderson-COF** (0.1 mg/mL) and different scavengers.

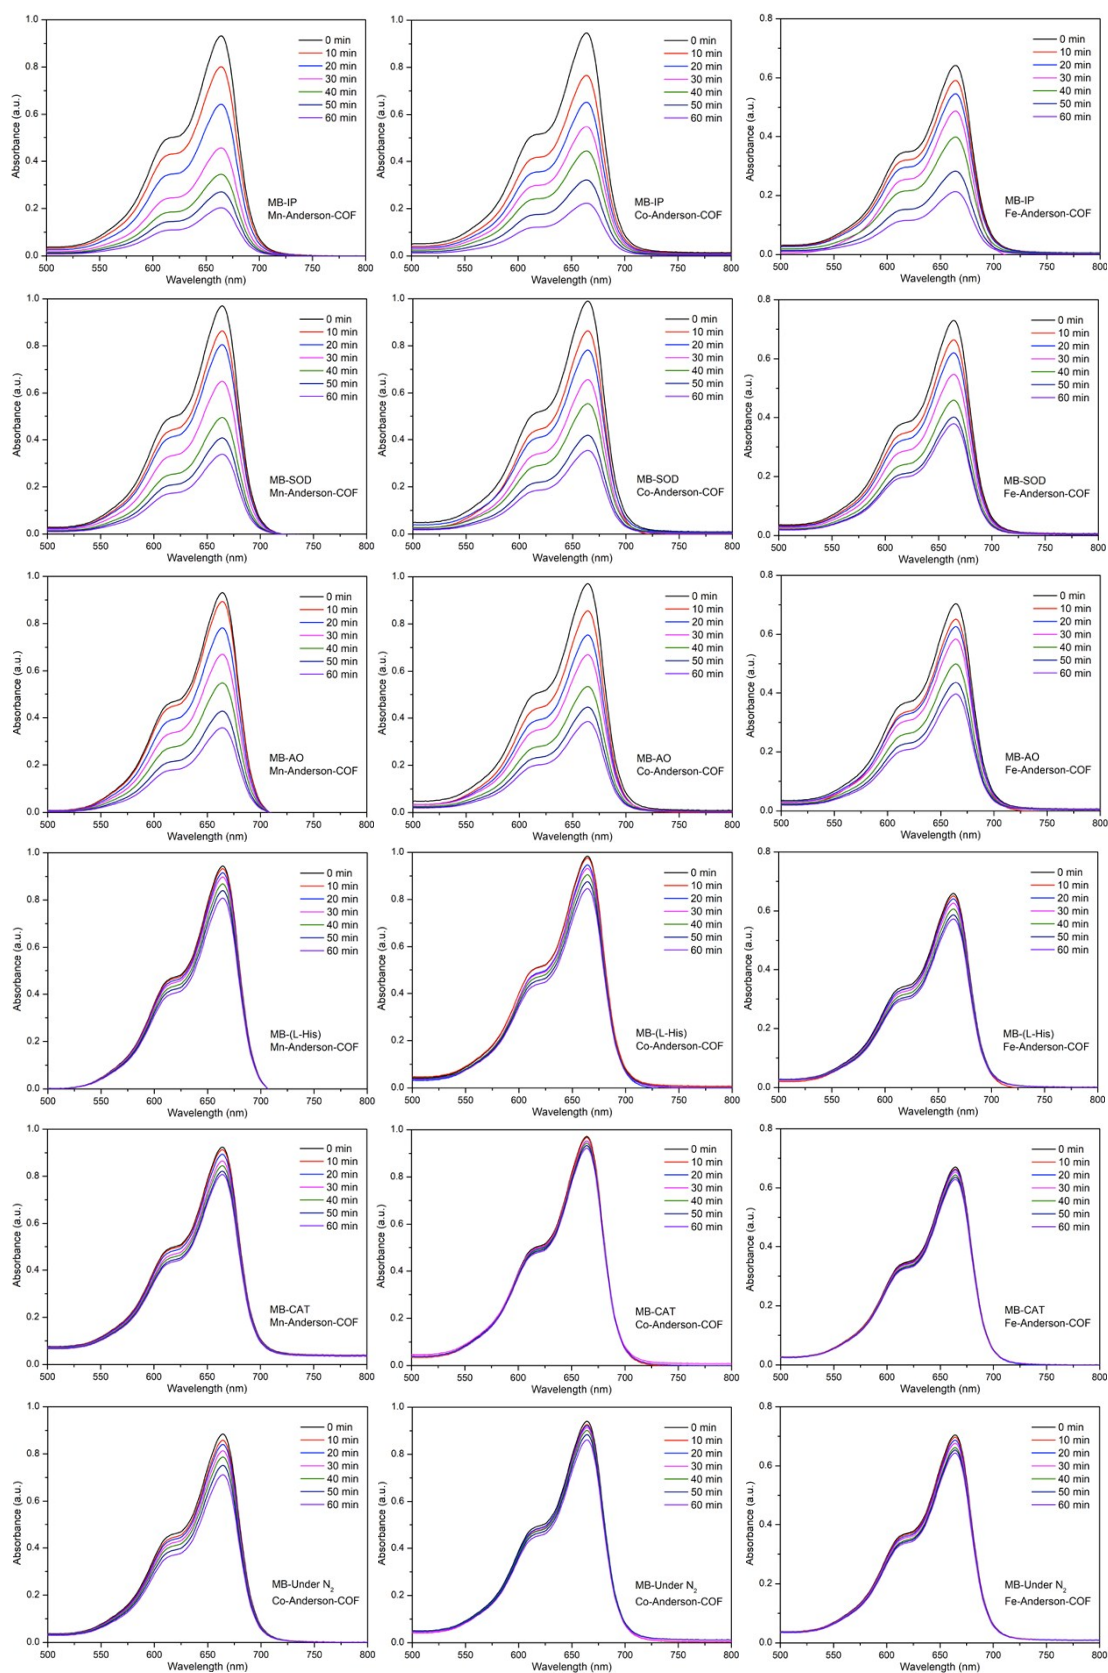

**Figure S15.** UV-vis spectra of MB (100 mg/L) after different illumination time intervals in the presence of **M-Anderson-COF** (0.1 mg/mL) and different scavengers.

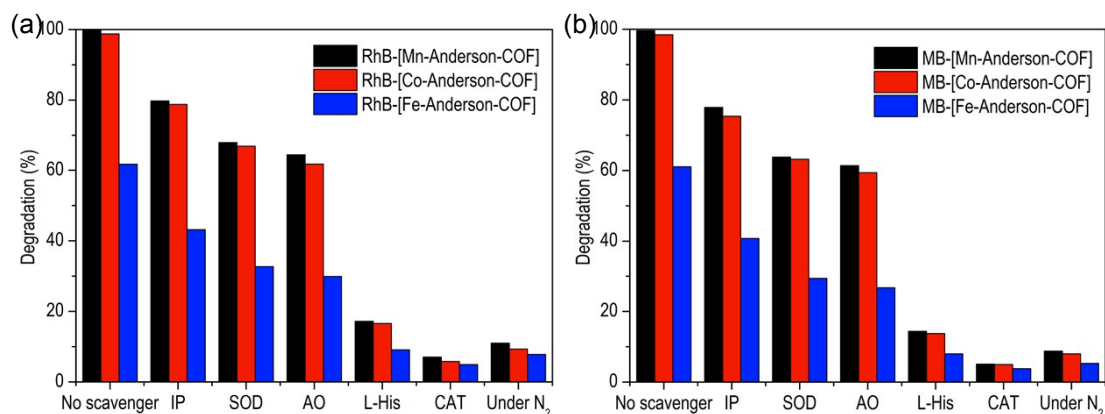

**Figure S16.** The effect of different scavengers, isopropanol (IP), superoxide dismutase (SOD), ammonium oxalate (AO), L-Histidine (L-His) and catalase (CAT), and the absence of oxygen (under N<sub>2</sub>) on the degradation of RhB (a) and MB (b) over **M-Anderson-COF** under 60 min of visible light irradiation.

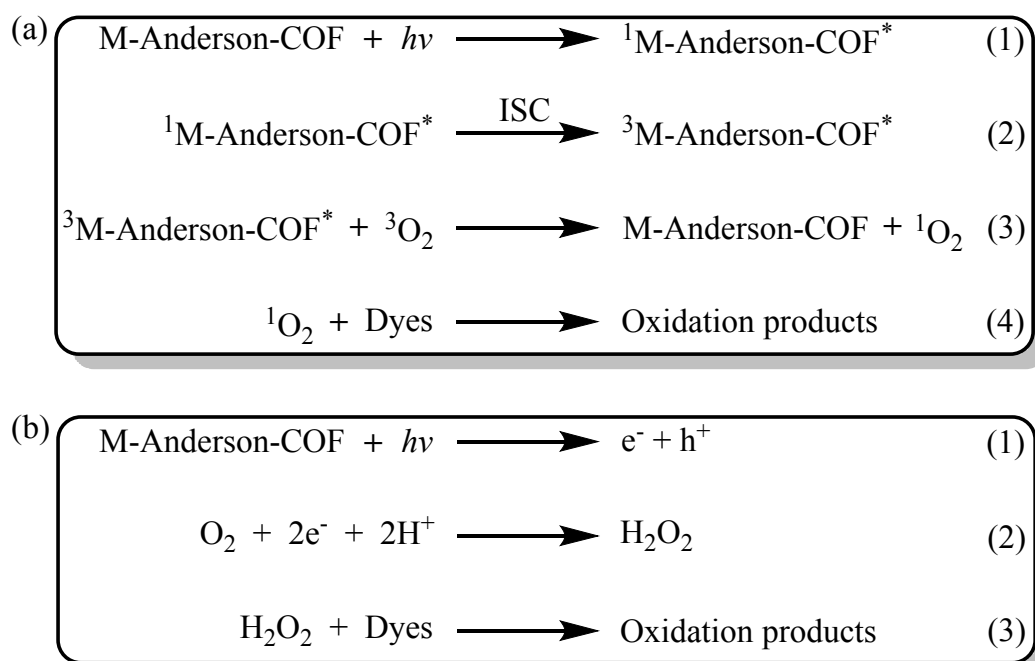

**Figure S17.** Proposed photodegradation reaction mechanism.

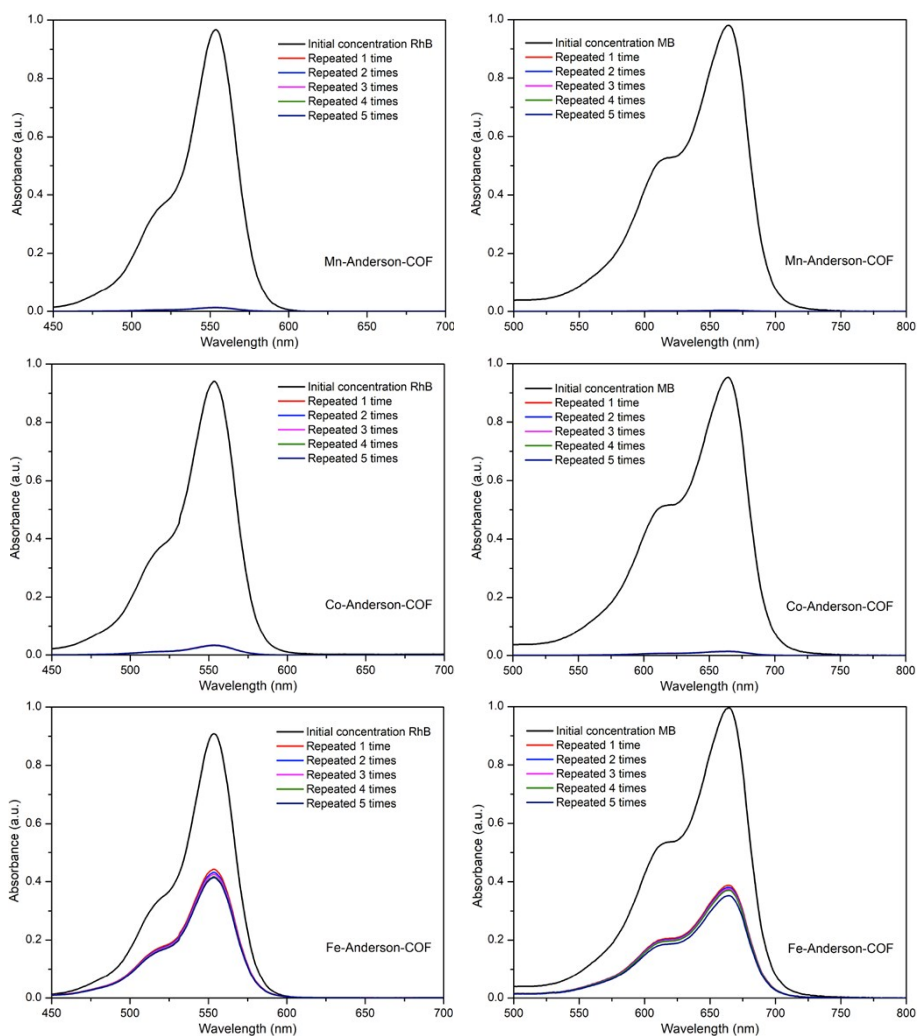

**Figure S18.** UV-vis spectra of RhB and MB in the presence of recycled **M-Anderson-COF** (0.1 mg/mL) in water under visible light irradiation.

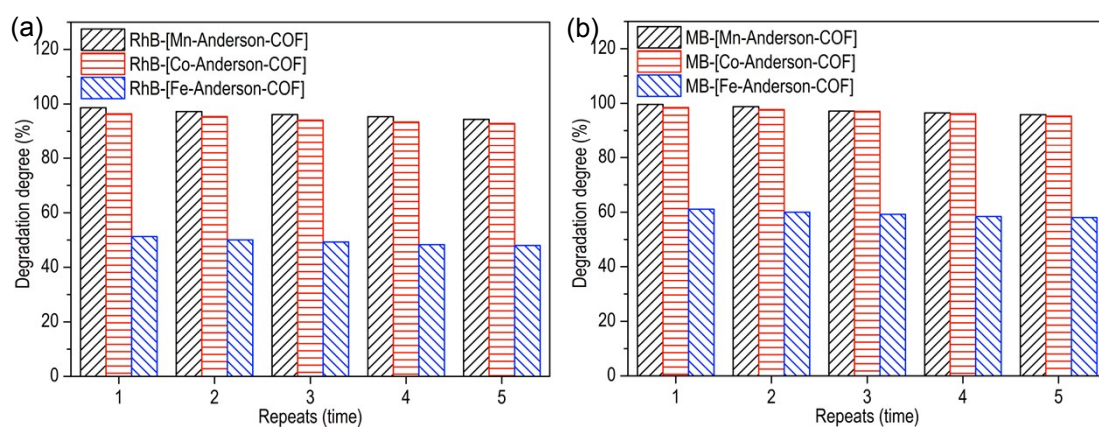

**Figure S19.** Recycling experiments of the photocatalytic degradation of RhB (a) and MB (b) using **M-Anderson-COF** in water under visible light irradiation.

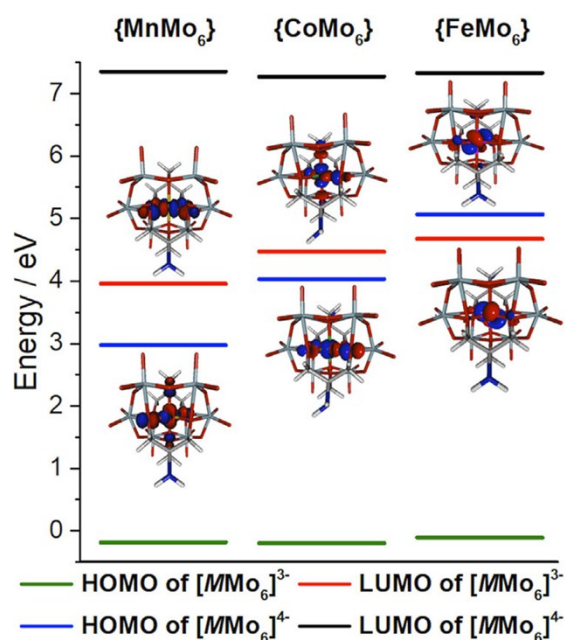

**Figure S20.** The HOMO–LUMO energy diagram of NH<sub>2</sub>-tris-functionalized Anderson anions {MMo<sub>6</sub>} (M=Mn<sup>3+</sup>, Co<sup>3+</sup>, Fe<sup>3+</sup>). Adapted with permission from Ref. [3].

**Table S1.** Summary of the performance of reported materials for the photodegradation of RhB.

| Materials                                                                                                                               | Catalyst (g/L) | RhB (mg/L) | Irradiation source | Efficiency      | Ref.      |
|-----------------------------------------------------------------------------------------------------------------------------------------|----------------|------------|--------------------|-----------------|-----------|
| Mn-Anderson-COF                                                                                                                         | 0.1            | 100        | Visible light      | 98.6% (60 min)  | This work |
| Co-Anderson-COF                                                                                                                         | 0.1            | 100        | Visible light      | 96.4% (60 min)  | This work |
| Fe-Anderson-COF                                                                                                                         | 0.1            | 100        | Visible light      | 51.3% (60 min)  | This work |
| Bn-Anderson-CMP                                                                                                                         | 0.4            | 10         | Visible light      | ~97% (60 min)   | 4         |
| Th-Anderson-CMP                                                                                                                         |                |            |                    | ~94% (60 min)   |           |
| TiO <sub>2</sub>                                                                                                                        | 1.0            | 10         | Visible light      | ~95% (210 min)  | 5         |
| Benzothiadiazole based CMPs                                                                                                             | 1.0            | 10         | Visible light      | ~87% (30 min)   | 6         |
| {Mn(salen) <sub>2</sub> (H <sub>2</sub> O) <sub>2</sub> [AlMo <sub>6</sub> (OH) <sub>6</sub> O <sub>18</sub> ]}[arg]•16H <sub>2</sub> O | 0.4            | 10         | Visible light      | 100% (300 min)  | 7         |
| {Mn(salen) <sub>2</sub> (H <sub>2</sub> O) <sub>2</sub> [CrMo <sub>6</sub> (OH) <sub>6</sub> O <sub>18</sub> ]}[arg]•11H <sub>2</sub> O |                |            |                    | 99.6% (300 min) |           |

**Table S2.** Summary of the performance of reported materials for the photodegradation of MB.

| Materials                                                                                                                                                                      | Catalyst (g/L)                                                       | MB (mg/L) | Irradiation source | Efficiency      | Ref.      |
|--------------------------------------------------------------------------------------------------------------------------------------------------------------------------------|----------------------------------------------------------------------|-----------|--------------------|-----------------|-----------|
| Mn-Anderson-COF                                                                                                                                                                | 0.1                                                                  | 100       | Visible light      | 99.6% (60 min)  | This work |
| Co-Anderson-COF                                                                                                                                                                | 0.1                                                                  | 100       | Visible light      | 98.4% (60 min)  | This work |
| Fe-Anderson-COF                                                                                                                                                                | 0.1                                                                  | 100       | Visible light      | 61.1% (60 min)  | This work |
| Fc-TEB-CMP                                                                                                                                                                     | 0.25                                                                 | 31.9      | Visible light      | 87.8% (60 min)  | 8         |
|                                                                                                                                                                                |                                                                      |           | Solar light        | 92.9% (60 min)  |           |
| Bn-Anderson-CMP                                                                                                                                                                | 0.4                                                                  | 10        | Visible light      | 100% (40 min)   | 4         |
| Th-Anderson-CMP                                                                                                                                                                |                                                                      |           |                    | ~97% (60 min)   |           |
| Ag <sub>3</sub> PO <sub>4</sub>                                                                                                                                                | 3.0                                                                  | 15.3      | Visible light      | 100% (10 min)   | 9         |
| PDINH                                                                                                                                                                          | 0.5                                                                  | 10        | Visible light      | 50% (400 min)   | 10        |
| [Ni <sub>2</sub> (H <sub>2</sub> O) <sub>2</sub> (qa) <sub>2</sub> (4,4'-bpy) <sub>2</sub> U <sub>5</sub> O <sub>14</sub> (H <sub>2</sub> O) <sub>2</sub> (OAc) <sub>2</sub> ] | 2.0                                                                  | 35.9      | Visible light      | 80% (240 min)   | 11        |
| Fe <sub>3</sub> O <sub>4</sub> @MIL-100(Fe)                                                                                                                                    | 0.1 (0.1 mL H <sub>2</sub> O <sub>2</sub> )                          | 40        | Visible light      | 99.8% (200 min) | 12        |
| NTU-9                                                                                                                                                                          | 0.5 (5 drops of 30% H <sub>2</sub> O <sub>2</sub> )                  | 31.9      | Visible light      | 100% (20 min)   | 13        |
| MIL-53(Fe)                                                                                                                                                                     | 1.0 ((NH <sub>4</sub> ) <sub>2</sub> S <sub>2</sub> O <sub>8</sub> ) | 127.6     | Visible light      | ~40% (60 min)   | 14        |
| ZnTCPc/UIO-66(NH <sub>2</sub> )                                                                                                                                                | 0.2                                                                  | 15        | Visible light      | ~90% (120 min)  | 15        |
| Cu(dm-bim)                                                                                                                                                                     | 30 (5 drops of 30% H <sub>2</sub> O <sub>2</sub> )                   | 18.7      | Visible light      | 96% (20 min)    | 16        |
| [Cu <sup>II</sup> (salimcy)](Cu <sup>II</sup> ) <sub>2</sub>                                                                                                                   | 0.6                                                                  | 12        | Visible light      | 96% (20 min)    | 17        |
| Fe <sub>3</sub> O <sub>4</sub> /FePc                                                                                                                                           | 1.0 (1 mL 9M H <sub>2</sub> O <sub>2</sub> )                         | 10        | Visible light      | 78% (120 min)   | 18        |
| mesoporous BiVO <sub>4</sub>                                                                                                                                                   | 1.0                                                                  | 10        | Visible light      | 85% (180 min)   | 19        |
| VC 1.0%                                                                                                                                                                        | 0.5                                                                  | 10        | Visible light      | ~90% (120 min)  | 20        |
| Fe-Ni/SiO <sub>2</sub>                                                                                                                                                         | 0.85 (3mM)                                                           | 30        | Visible light      | 94.9%           | 21        |

|                                                                 |                                         |      |               |                   |    |
|-----------------------------------------------------------------|-----------------------------------------|------|---------------|-------------------|----|
|                                                                 |                                         |      |               | (60 min)          |    |
|                                                                 | H <sub>2</sub> O <sub>2</sub> , pH=3.0) | 20   | Visible light | 99.0%<br>(60 min) |    |
|                                                                 |                                         | 20   | Solar light   | 99.8%<br>(60 min) |    |
| CuO/NX                                                          | 0.1<br>(PH = 11)                        | 5    | Solar light   | 90%<br>(160 min)  | 22 |
| g-C <sub>3</sub> N <sub>4</sub> /Co <sub>3</sub> O <sub>4</sub> | 0.5                                     | 3.19 | Solar light   | 100%<br>(90 min)  | 23 |

#### References:

- (1) P. R. Marcoux, B. Hasenknopf, J. Vaissermann, P. Gouzerh, *Eur. J. Inorg. Chem.*, 2003, **2003**, 2406.
- (2) M. Zhang, Z. Perry, J. Park, H. C. Zhou, *Polymer.*, 2014, **55**, 335.
- (3) S. Schönweiz, M. Heiland, M. Anjass, T. Jacob, S. Rau, C. Streb, *Chem. Eur. J.*, 2017, **23**, 15370.
- (4) Y. Li, M. Liu, L. Chen, *J. Mater. Chem. A*, 2017, **5**, 13757.
- (5) C. Chen, W. Zhao, P. Lei, J. Zhao, N. Serpone, *Chem. Eur. J.*, 2004, **10**, 1956.
- (6) B. C. Ma, S. Ghasimi, K. Landfester, F. Vilela, K. A. I. Zhang, *J. Mater. Chem. A*, 2015, **3**, 16064.
- (7) Q. Wu, W.-L. Chen, D. Liu, C. Liang, Y.-G. Li, S.-W. Lin, E. Wang, *Dalton Trans.*, 2011, **40**, 56.
- (8) L. Ma, Y. Liu, Y. Liu, S. Jiang, P. Li, Y. Hao, P. Shao, A. Yin, X. Feng, B. Wang, *Angew. Chem. Int. Ed.*, 2019, **58**, 4221.
- (9) Z. Yi, J. Ye, N. Kikugawa, T. Kako, S. Ouyang, H. Stuart-Williams, H. Yang, J. Cao, W. Luo, Z. Li, Y. Liu, R. L. Withers, *Nat. Mater.*, 2010, **9**, 559.
- (10) D. Liu, J. Wang, X. J. Bai, R. L. Zong, Y. F. Zhu, *Adv. Mater.*, 2016, **28**, 7284.
- (11) Z. T. Yu, Z. L. Liao, Y. S. Jiang, G. H. Li, G. D. Li, J. S. Chen, *Chem. Commun.*, 2004, 1814.
- (12) C. F. Zhang, L. G. Qiu, F. Ke, Y. J. Zhu, Y. P. Yuan, G. S. Xu, X. Jiang, *J. Mater. Chem. A*, 2013, **1**, 14329.
- (13) J. K. Gao, J. W. Miao, P. Z. Li, W. Y. Teng, L. Yang, Y. L. Zhao, B. Liu, Q. C. Zhang, *Chem. Commun.*, 2014, **50**, 3786.
- (14) J. J. Du, Y. P. Yuan, J. X. Sun, F. M. Peng, X. Jiang, L. G. Qiu, A. J. Xie, Y. H. Shen, J. F. Zhu, *J. Hazard. Mater.*, 2011, **190**, 945.
- (15) Q. Liang, M. Zhang, Z. H. Zhang, C. H. Liu, S. Xu, Z. Y. Li, *J. Alloys Compd.*, 2017, **690**, 123.



- (16) T. Wen, D. X. Zhang, J. Liu, R. Lin, J. Zhang, *Chem. Commun.*, 2013, **49**, 5660.
- (17) Y. L. Hou, R. W. Y. Sun, X. P. Zhou, J. H. Wang, D. Li, *Chem. Commun.*, 2014, 50, 2295.
- (18) K. Wang, L. X. Yu, S. Yin, H. Li, H. M. Li, *Pure Appl. Chem.*, 2009, **81**, 2327.
- (19) G. S. Li, D. Q. Zhang, J. C. Yu, *Chem. Mater.*, 2008, **20**, 3983.
- (20) Y. Z. Hong, Y. H. Jiang, C. S. Li, W. Q. Fan, X. Yan, M. Yan, W. D. Shi, *Appl. Catal. B-Environ.*, 2016, **180**, 663.
- (21) Y. Ahmed, Z. Yaakob, P. Akhtar, *Catal. Sci. Technol.*, 2016, **6**, 1222.
- (22) A. Nezamzadeh-Ejehieh, M. Karimi-Shamsabadi, *Chem. Eng. J.*, 2013, **228**, 631.
- (23) P. Suyana, P. Ganguly, B. N. Nair, A. P. Mohamed, K. G. K. Warriar, *U. S. Hareesh, Environ. Sci.: Nano*, 2017, **4**, 212.
- (24) W. Xu, X. Pei, C. S. Diercks, H. Lyu, Z. Ji, O. M. Yaghi, *J. Am. Chem. Soc.*, 2019, **141**, 17522.
